# Supplementary material
Source: Springer Nature journal article supplement (https://www.springermedizin.de/resource/supplementary/12995_2007_55_MOESM3_ESM.pdf/9622648)

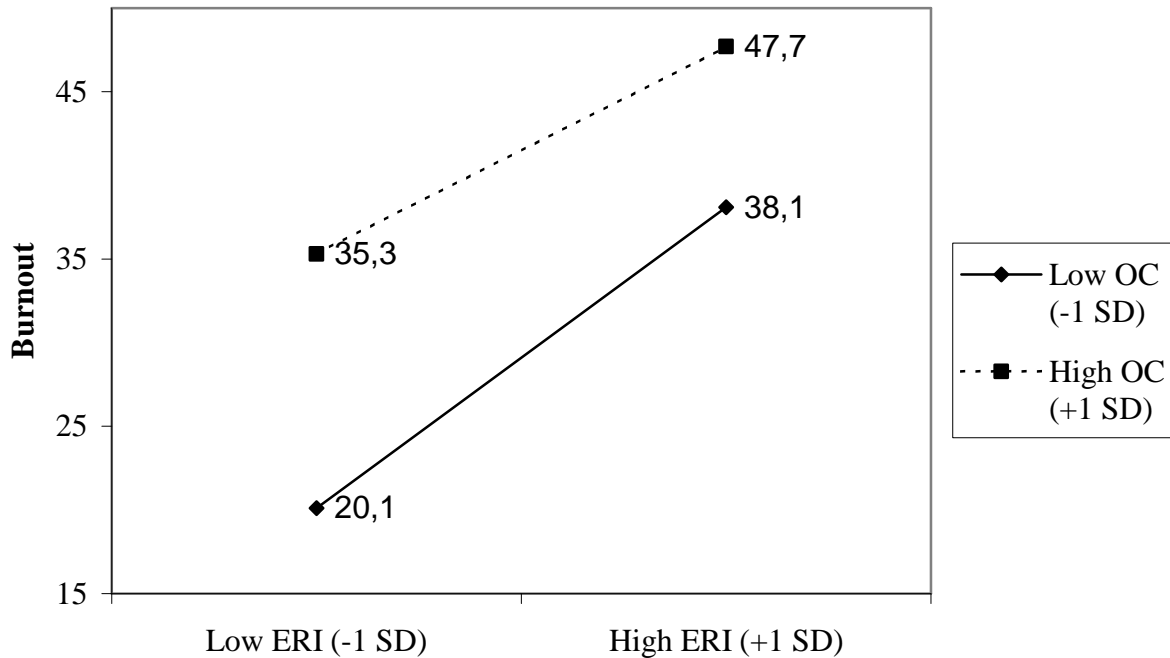

Supplement: MOESM3 [file 9622648]
